# Supplementary material for: Isoquercetin Improves Hepatic Lipid Accumulation by Activating AMPK Pathway and Suppressing TGF-β Signaling on an HFD-Induced Nonalcoholic Fatty Liver Disease Rat Model
Source: MDPI journal article supplement (doi:10.3390/ijms19124126), 2018-12-19
Supplement: s1 [file s1]

1     **Supplementary materials**

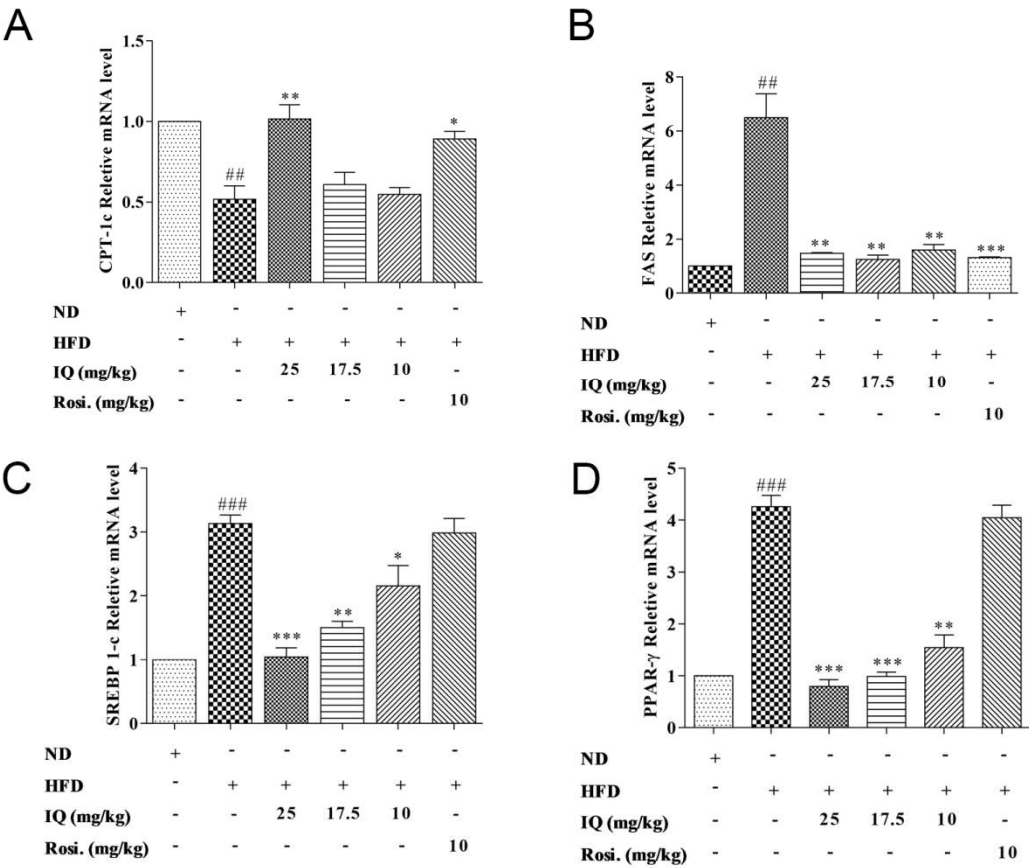

2

3     **Figure S1.** IQ regulated lipogenic and lipolytic genes on HFD induced NAFLD rat. (A) CPT-1.  
4     (B) FAS. (C) SREBP1-C. (D) PPAR- $\gamma$ . The data represents  $\pm$  SD.  $P<0.05$  was considered as  
5     statistically significant.  $##P<0.01$ ,  $###P<0.001$  represent compared with control.  $*P<0.05$ ,  $**$   
6      $P<0.01$ ,  $***P<0.001$  represent compared with model. The significant statistical difference as  
7     calculated by ANOVA followed by turkey's test. (n=6 each group).
